# Supplementary material
Source: publisher figshare collection journal article supplement (https://acs.figshare.com/ndownloader/files/4526149)
Supplement: Supplementary file 1 [file 4526149]

data_publication_text
_publ_requested_journal          Angew.Chem.,Int.Ed.
_publ_contact_author_name        'Chunming Cui'
_publ_contact_author_address     
;State Key Laboratory and Institute of Elemento-organic Chemistry
Nankai University
Tianjin, 300071
China
;
_publ_contact_author_email       cmcui@nankai.edu.cn
_publ_contact_author_phone       +86-22-23503461
_publ_contact_author_fax         +86-22-23503461
loop_
_publ_author_name
_publ_author_address
'Cui, Chunming'
;State Key Laboratory and Institute of Elemento-organic Chemistry
Nankai University
Tianjin, 300071
China
;

  
data_r81009b1 
  
_audit_creation_method            SHELXL-97 
_chemical_name_systematic 
; 
 ? 
; 
_chemical_name_common             ? 
_chemical_melting_point           ? 
_chemical_formula_moiety          ? 
_chemical_formula_sum 
 'C37 H60 N4 Si2' 
_chemical_formula_weight          617.07 
  
loop_ 
 _atom_type_symbol 
 _atom_type_description 
 _atom_type_scat_dispersion_real 
 _atom_type_scat_dispersion_imag 
 _atom_type_scat_source 
 'C'  'C'   0.0033   0.0016 
 'International Tables Vol C Tables 4.2.6.8 and 6.1.1.4' 
 'H'  'H'   0.0000   0.0000 
 'International Tables Vol C Tables 4.2.6.8 and 6.1.1.4' 
 'N'  'N'   0.0061   0.0033 
 'International Tables Vol C Tables 4.2.6.8 and 6.1.1.4' 
 'Si'  'Si'   0.0817   0.0704 
 'International Tables Vol C Tables 4.2.6.8 and 6.1.1.4' 
  
_symmetry_cell_setting            Monoclinic 
_symmetry_space_group_name_H-M    P2(1)/c 
  
loop_ 
 _symmetry_equiv_pos_as_xyz 
 'x, y, z' 
 '-x, y+1/2, -z+1/2' 
 '-x, -y, -z' 
 'x, -y-1/2, z-1/2' 
  
_cell_length_a                    29.013(6) 
_cell_length_b                    11.349(2) 
_cell_length_c                    23.425(5) 
_cell_angle_alpha                 90.00 
_cell_angle_beta                  99.15(3) 
_cell_angle_gamma                 90.00 
_cell_volume                      7615(3) 
_cell_formula_units_Z             8 
_cell_measurement_temperature     113(2) 
_cell_measurement_reflns_used     19069 
_cell_measurement_theta_min       1.761 
_cell_measurement_theta_max       27.472 
  
_exptl_crystal_description        ? 
_exptl_crystal_colour             ? 
_exptl_crystal_size_max           0.26 
_exptl_crystal_size_mid           0.20 
_exptl_crystal_size_min           0.12 
_exptl_crystal_density_meas       ? 
_exptl_crystal_density_diffrn     1.076 
_exptl_crystal_density_method     'not measured' 
_exptl_crystal_F_000              2704 
_exptl_absorpt_coefficient_mu     0.122 
_exptl_absorpt_correction_type    MULTI-SCAN 
_exptl_absorpt_correction_T_min   0.9690 
_exptl_absorpt_correction_T_max   0.9855 
_exptl_absorpt_process_details    crystalclear 
  
_exptl_special_details 
; 
 ? 
; 
  
_diffrn_ambient_temperature       113(2) 
_diffrn_radiation_wavelength      0.71073 
_diffrn_radiation_type            MoK\a 
_diffrn_radiation_source          'rotating anode' 
_diffrn_radiation_monochromator   confocal 
_diffrn_measurement_device_type   'rigaku saturn' 
_diffrn_measurement_method        '\w scans' 
_diffrn_detector_area_resol_mean  ? 
_diffrn_standards_number          0 
_diffrn_standards_interval_count  0 
_diffrn_standards_interval_time   0 
_diffrn_standards_decay_%         0 
_diffrn_reflns_number             50498 
_diffrn_reflns_av_R_equivalents   0.0511 
_diffrn_reflns_av_sigmaI/netI     0.0551 
_diffrn_reflns_limit_h_min        -34 
_diffrn_reflns_limit_h_max        34 
_diffrn_reflns_limit_k_min        -13 
_diffrn_reflns_limit_k_max        11 
_diffrn_reflns_limit_l_min        -27 
_diffrn_reflns_limit_l_max        26 
_diffrn_reflns_theta_min          1.76 
_diffrn_reflns_theta_max          25.02 
_reflns_number_total              13373 
_reflns_number_gt                 10769 
_reflns_threshold_expression      >2sigma(I) 
  
_computing_data_collection        'crystalclear' 
_computing_cell_refinement        'crystalclear' 
_computing_data_reduction         'crystalclear' 
_computing_structure_solution     'SHELXS-97 (Sheldrick, 1990)' 
_computing_structure_refinement   'SHELXL-97 (Sheldrick, 1997)' 
_computing_molecular_graphics     'Bruker SHELXTL' 
_computing_publication_material   'Bruker SHELXTL' 
  
_refine_special_details 
; 
 Refinement of F^2^ against ALL reflections.  The weighted R-factor wR and 
 goodness of fit S are based on F^2^, conventional R-factors R are based 
 on F, with F set to zero for negative F^2^. The threshold expression of 
 F^2^ > 2sigma(F^2^) is used only for calculating R-factors(gt) etc. and is 
 not relevant to the choice of reflections for refinement.  R-factors based 
 on F^2^ are statistically about twice as large as those based on F, and R- 
 factors based on ALL data will be even larger. 
; 
  
_refine_ls_structure_factor_coef  Fsqd 
_refine_ls_matrix_type            full 
_refine_ls_weighting_scheme       calc 
_refine_ls_weighting_details 
 'calc w=1/[\s^2^(Fo^2^)+(0.0649P)^2^+3.3132P] where P=(Fo^2^+2Fc^2^)/3' 
_atom_sites_solution_primary      direct 
_atom_sites_solution_secondary    difmap 
_atom_sites_solution_hydrogens    geom 
_refine_ls_hydrogen_treatment     CONSTR 
_refine_ls_extinction_method      none 
_refine_ls_extinction_coef        ? 
_refine_ls_number_reflns          13373 
_refine_ls_number_parameters      807 
_refine_ls_number_restraints      0 
_refine_ls_R_factor_all           0.0709 
_refine_ls_R_factor_gt            0.0549 
_refine_ls_wR_factor_ref          0.1460 
_refine_ls_wR_factor_gt           0.1352 
_refine_ls_goodness_of_fit_ref    1.089 
_refine_ls_restrained_S_all       1.089 
_refine_ls_shift/su_max           0.002 
_refine_ls_shift/su_mean          0.000 
  
loop_ 
 _atom_site_label 
 _atom_site_type_symbol 
 _atom_site_fract_x 
 _atom_site_fract_y 
 _atom_site_fract_z 
 _atom_site_U_iso_or_equiv 
 _atom_site_adp_type 
 _atom_site_occupancy 
 _atom_site_symmetry_multiplicity 
 _atom_site_calc_flag 
 _atom_site_refinement_flags 
 _atom_site_disorder_assembly 
 _atom_site_disorder_group 
Si1 Si 0.38321(2) 0.63676(5) 0.11336(3) 0.01978(15) Uani 1 1 d . . . 
Si2 Si 0.43315(2) 0.47194(5) 0.08326(3) 0.02428(16) Uani 1 1 d . . . 
Si3 Si 0.11632(2) 0.33914(5) 0.38716(3) 0.01919(14) Uani 1 1 d . . . 
Si4 Si 0.07036(2) 0.51906(5) 0.40896(3) 0.02009(15) Uani 1 1 d . . . 
N1 N 0.40253(6) 0.59361(15) 0.04991(8) 0.0200(4) Uani 1 1 d . . . 
N2 N 0.41106(6) 0.51295(15) 0.14521(8) 0.0214(4) Uani 1 1 d . . . 
N3 N 0.24491(6) 0.59207(16) 0.07875(8) 0.0245(4) Uani 1 1 d . . . 
N4 N 0.28797(6) 0.70040(15) 0.14011(8) 0.0218(4) Uani 1 1 d . . . 
N5 N 0.08800(6) 0.45496(15) 0.34817(8) 0.0200(4) Uani 1 1 d . . . 
N6 N 0.10044(6) 0.40357(15) 0.44851(7) 0.0199(4) Uani 1 1 d . . . 
N7 N 0.25418(6) 0.38600(16) 0.40460(8) 0.0260(4) Uani 1 1 d . . . 
N8 N 0.20830(6) 0.26542(15) 0.35369(8) 0.0229(4) Uani 1 1 d . . . 
C1 C 0.41472(7) 0.46024(18) 0.20134(10) 0.0228(5) Uani 1 1 d . . . 
C2 C 0.38081(8) 0.37848(19) 0.21365(10) 0.0245(5) Uani 1 1 d . . . 
C3 C 0.38581(8) 0.3276(2) 0.26792(11) 0.0334(6) Uani 1 1 d . . . 
H3 H 0.3635 0.2740 0.2761 0.040 Uiso 1 1 calc R . . 
C4 C 0.42288(9) 0.3542(3) 0.31008(11) 0.0434(7) Uani 1 1 d . . . 
H4 H 0.4259 0.3182 0.3462 0.052 Uiso 1 1 calc R . . 
C5 C 0.45570(9) 0.4353(3) 0.29814(11) 0.0413(7) Uani 1 1 d . . . 
H5 H 0.4806 0.4540 0.3269 0.050 Uiso 1 1 calc R . . 
C6 C 0.45256(8) 0.4895(2) 0.24450(10) 0.0285(5) Uani 1 1 d . . . 
C7 C 0.48992(8) 0.5787(2) 0.23490(11) 0.0318(6) Uani 1 1 d . . . 
H7 H 0.4824 0.6074 0.1951 0.038 Uiso 1 1 calc R . . 
C8 C 0.48959(10) 0.6844(3) 0.27537(14) 0.0510(8) Uani 1 1 d . . . 
H8A H 0.4592 0.7202 0.2691 0.077 Uiso 1 1 calc R . . 
H8B H 0.5124 0.7409 0.2676 0.077 Uiso 1 1 calc R . . 
H8C H 0.4969 0.6585 0.3148 0.077 Uiso 1 1 calc R . . 
C9 C 0.53864(8) 0.5238(2) 0.24249(12) 0.0420(7) Uani 1 1 d . . . 
H9A H 0.5475 0.4988 0.2819 0.063 Uiso 1 1 calc R . . 
H9B H 0.5606 0.5810 0.2331 0.063 Uiso 1 1 calc R . . 
H9C H 0.5384 0.4571 0.2173 0.063 Uiso 1 1 calc R . . 
C10 C 0.33788(8) 0.3454(2) 0.17035(11) 0.0290(5) Uani 1 1 d . . . 
H10 H 0.3404 0.3839 0.1335 0.035 Uiso 1 1 calc R . . 
C11 C 0.33500(10) 0.2121(2) 0.15999(12) 0.0447(7) Uani 1 1 d . . . 
H11A H 0.3635 0.1850 0.1486 0.067 Uiso 1 1 calc R . . 
H11B H 0.3093 0.1949 0.1299 0.067 Uiso 1 1 calc R . . 
H11C H 0.3303 0.1730 0.1949 0.067 Uiso 1 1 calc R . . 
C12 C 0.29330(8) 0.3900(2) 0.19066(12) 0.0387(6) Uani 1 1 d . . . 
H12A H 0.2913 0.3575 0.2280 0.058 Uiso 1 1 calc R . . 
H12B H 0.2666 0.3659 0.1636 0.058 Uiso 1 1 calc R . . 
H12C H 0.2941 0.4744 0.1931 0.058 Uiso 1 1 calc R . . 
C13 C 0.40485(7) 0.65290(18) -0.00378(9) 0.0213(5) Uani 1 1 d . . . 
C14 C 0.43026(7) 0.75940(19) -0.00492(10) 0.0245(5) Uani 1 1 d . . . 
C15 C 0.43057(8) 0.8160(2) -0.05762(10) 0.0292(5) Uani 1 1 d . . . 
H15 H 0.4469 0.8864 -0.0582 0.035 Uiso 1 1 calc R . . 
C16 C 0.40739(8) 0.7710(2) -0.10885(10) 0.0323(6) Uani 1 1 d . . . 
H16 H 0.4077 0.8106 -0.1435 0.039 Uiso 1 1 calc R . . 
C17 C 0.38366(8) 0.6661(2) -0.10762(10) 0.0303(5) Uani 1 1 d . . . 
H17 H 0.3686 0.6343 -0.1422 0.036 Uiso 1 1 calc R . . 
C18 C 0.38150(7) 0.60619(19) -0.05646(10) 0.0247(5) Uani 1 1 d . . . 
C19 C 0.35332(8) 0.4927(2) -0.06041(10) 0.0292(5) Uani 1 1 d . . . 
H19 H 0.3545 0.4613 -0.0212 0.035 Uiso 1 1 calc R . . 
C20 C 0.37383(10) 0.4000(2) -0.09675(12) 0.0460(7) Uani 1 1 d . . . 
H20A H 0.3734 0.4297 -0.1352 0.069 Uiso 1 1 calc R . . 
H20B H 0.3555 0.3293 -0.0983 0.069 Uiso 1 1 calc R . . 
H20C H 0.4054 0.3831 -0.0795 0.069 Uiso 1 1 calc R . . 
C21 C 0.30238(9) 0.5161(3) -0.08548(12) 0.0461(7) Uani 1 1 d . . . 
H21A H 0.2902 0.5760 -0.0631 0.069 Uiso 1 1 calc R . . 
H21B H 0.2846 0.4450 -0.0843 0.069 Uiso 1 1 calc R . . 
H21C H 0.3003 0.5421 -0.1248 0.069 Uiso 1 1 calc R . . 
C22 C 0.45696(7) 0.81693(19) 0.04903(10) 0.0251(5) Uani 1 1 d . . . 
H22 H 0.4570 0.7622 0.0814 0.030 Uiso 1 1 calc R . . 
C23 C 0.50783(8) 0.8412(2) 0.04254(11) 0.0335(6) Uani 1 1 d . . . 
H23A H 0.5238 0.7678 0.0399 0.050 Uiso 1 1 calc R . . 
H23B H 0.5229 0.8845 0.0755 0.050 Uiso 1 1 calc R . . 
H23C H 0.5087 0.8865 0.0081 0.050 Uiso 1 1 calc R . . 
C24 C 0.43244(8) 0.9301(2) 0.06313(11) 0.0328(6) Uani 1 1 d . . . 
H24A H 0.4326 0.9858 0.0323 0.049 Uiso 1 1 calc R . . 
H24B H 0.4486 0.9630 0.0985 0.049 Uiso 1 1 calc R . . 
H24C H 0.4008 0.9125 0.0674 0.049 Uiso 1 1 calc R . . 
C25 C 0.41441(10) 0.3213(2) 0.05811(12) 0.0401(6) Uani 1 1 d . . . 
H25A H 0.4296 0.2641 0.0849 0.060 Uiso 1 1 calc R . . 
H25B H 0.4228 0.3077 0.0206 0.060 Uiso 1 1 calc R . . 
H25C H 0.3812 0.3143 0.0558 0.060 Uiso 1 1 calc R . . 
C26 C 0.49716(8) 0.4826(3) 0.08580(11) 0.0398(6) Uani 1 1 d . . . 
H26A H 0.5074 0.5607 0.0972 0.060 Uiso 1 1 calc R . . 
H26B H 0.5048 0.4657 0.0482 0.060 Uiso 1 1 calc R . . 
H26C H 0.5125 0.4267 0.1133 0.060 Uiso 1 1 calc R . . 
C27 C 0.31884(7) 0.64367(18) 0.10738(9) 0.0209(5) Uani 1 1 d . . . 
C28 C 0.29010(7) 0.57745(19) 0.06887(10) 0.0239(5) Uani 1 1 d . . . 
H28 H 0.2994 0.5299 0.0404 0.029 Uiso 1 1 calc R . . 
C29 C 0.24283(8) 0.67015(19) 0.12280(10) 0.0254(5) Uani 1 1 d . . . 
H29 H 0.2166 0.6962 0.1374 0.030 Uiso 1 1 calc R . . 
C30 C 0.20284(8) 0.5378(2) 0.04350(11) 0.0303(5) Uani 1 1 d . . . 
C31 C 0.21519(9) 0.4146(2) 0.02422(12) 0.0403(6) Uani 1 1 d . . . 
H31A H 0.2379 0.4208 -0.0013 0.060 Uiso 1 1 calc R . . 
H31B H 0.1876 0.3769 0.0044 0.060 Uiso 1 1 calc R . . 
H31C H 0.2278 0.3687 0.0575 0.060 Uiso 1 1 calc R . . 
C32 C 0.18760(9) 0.6163(2) -0.00863(12) 0.0403(6) Uani 1 1 d . . . 
H32A H 0.1813 0.6941 0.0042 0.060 Uiso 1 1 calc R . . 
H32B H 0.1599 0.5845 -0.0312 0.060 Uiso 1 1 calc R . . 
H32C H 0.2120 0.6199 -0.0318 0.060 Uiso 1 1 calc R . . 
C33 C 0.16430(9) 0.5286(3) 0.08049(13) 0.0448(7) Uani 1 1 d . . . 
H33A H 0.1750 0.4819 0.1141 0.067 Uiso 1 1 calc R . . 
H33B H 0.1373 0.4921 0.0585 0.067 Uiso 1 1 calc R . . 
H33C H 0.1562 0.6060 0.0922 0.067 Uiso 1 1 calc R . . 
C34 C 0.30317(8) 0.78292(19) 0.18911(10) 0.0255(5) Uani 1 1 d . . . 
C35 C 0.26123(8) 0.8195(2) 0.21664(11) 0.0357(6) Uani 1 1 d . . . 
H35A H 0.2385 0.8572 0.1882 0.054 Uiso 1 1 calc R . . 
H35B H 0.2711 0.8733 0.2478 0.054 Uiso 1 1 calc R . . 
H35C H 0.2476 0.7510 0.2313 0.054 Uiso 1 1 calc R . . 
C36 C 0.33843(8) 0.7199(2) 0.23444(10) 0.0331(6) Uani 1 1 d . . . 
H36A H 0.3242 0.6512 0.2479 0.050 Uiso 1 1 calc R . . 
H36B H 0.3481 0.7721 0.2663 0.050 Uiso 1 1 calc R . . 
H36C H 0.3651 0.6970 0.2175 0.050 Uiso 1 1 calc R . . 
C37 C 0.32462(8) 0.8931(2) 0.16636(11) 0.0323(6) Uani 1 1 d . . . 
H37A H 0.3509 0.8709 0.1484 0.049 Uiso 1 1 calc R . . 
H37B H 0.3347 0.9458 0.1979 0.049 Uiso 1 1 calc R . . 
H37C H 0.3017 0.9316 0.1385 0.049 Uiso 1 1 calc R . . 
C38 C 0.08158(7) 0.48428(17) 0.28826(9) 0.0198(5) Uani 1 1 d . . . 
C39 C 0.11420(7) 0.55653(18) 0.26577(9) 0.0221(5) Uani 1 1 d . . . 
C40 C 0.10691(8) 0.58150(19) 0.20694(10) 0.0270(5) Uani 1 1 d . . . 
H40 H 0.1280 0.6297 0.1919 0.032 Uiso 1 1 calc R . . 
C41 C 0.06909(8) 0.5364(2) 0.17027(10) 0.0302(5) Uani 1 1 d . . . 
H41 H 0.0649 0.5534 0.1310 0.036 Uiso 1 1 calc R . . 
C42 C 0.03753(8) 0.46599(19) 0.19241(10) 0.0262(5) Uani 1 1 d . . . 
H42 H 0.0121 0.4359 0.1675 0.031 Uiso 1 1 calc R . . 
C43 C 0.04259(7) 0.43861(18) 0.25089(9) 0.0221(5) Uani 1 1 d . . . 
C44 C 0.00676(8) 0.35850(19) 0.27171(10) 0.0260(5) Uani 1 1 d . . . 
H44 H 0.0164 0.3462 0.3133 0.031 Uiso 1 1 calc R . . 
C45 C 0.00546(10) 0.2381(2) 0.24243(12) 0.0416(7) Uani 1 1 d . . . 
H45A H -0.0046 0.2472 0.2016 0.062 Uiso 1 1 calc R . . 
H45B H -0.0159 0.1876 0.2581 0.062 Uiso 1 1 calc R . . 
H45C H 0.0361 0.2038 0.2491 0.062 Uiso 1 1 calc R . . 
C46 C -0.04195(8) 0.4137(2) 0.26310(12) 0.0383(6) Uani 1 1 d . . . 
H46A H -0.0408 0.4877 0.2831 0.057 Uiso 1 1 calc R . . 
H46B H -0.0632 0.3617 0.2781 0.057 Uiso 1 1 calc R . . 
H46C H -0.0525 0.4264 0.2226 0.057 Uiso 1 1 calc R . . 
C47 C 0.15793(7) 0.60504(19) 0.30312(10) 0.0253(5) Uani 1 1 d . . . 
H47 H 0.1577 0.5790 0.3430 0.030 Uiso 1 1 calc R . . 
C48 C 0.15864(8) 0.7400(2) 0.30291(11) 0.0329(6) Uani 1 1 d . . . 
H48A H 0.1593 0.7678 0.2643 0.049 Uiso 1 1 calc R . . 
H48B H 0.1859 0.7675 0.3280 0.049 Uiso 1 1 calc R . . 
H48C H 0.1312 0.7693 0.3162 0.049 Uiso 1 1 calc R . . 
C49 C 0.20190(8) 0.5552(2) 0.28361(11) 0.0332(6) Uani 1 1 d . . . 
H49A H 0.2020 0.4709 0.2871 0.050 Uiso 1 1 calc R . . 
H49B H 0.2290 0.5869 0.3075 0.050 Uiso 1 1 calc R . . 
H49C H 0.2023 0.5765 0.2440 0.050 Uiso 1 1 calc R . . 
C50 C 0.09736(7) 0.35412(18) 0.50406(9) 0.0205(5) Uani 1 1 d . . . 
C51 C 0.06667(7) 0.25961(18) 0.50974(9) 0.0220(5) Uani 1 1 d . . . 
C52 C 0.06631(8) 0.20966(19) 0.56386(10) 0.0285(5) Uani 1 1 d . . . 
H52 H 0.0466 0.1464 0.5672 0.034 Uiso 1 1 calc R . . 
C53 C 0.09442(8) 0.2513(2) 0.61262(10) 0.0325(6) Uani 1 1 d . . . 
H53 H 0.0940 0.2162 0.6484 0.039 Uiso 1 1 calc R . . 
C54 C 0.12318(8) 0.3461(2) 0.60728(10) 0.0307(5) Uani 1 1 d . . . 
H54 H 0.1418 0.3754 0.6402 0.037 Uiso 1 1 calc R . . 
C55 C 0.12512(8) 0.39917(19) 0.55428(10) 0.0250(5) Uani 1 1 d . . . 
C56 C 0.15742(8) 0.5045(2) 0.55320(10) 0.0293(5) Uani 1 1 d . . . 
H56 H 0.1550 0.5315 0.5131 0.035 Uiso 1 1 calc R . . 
C57 C 0.14236(10) 0.6060(2) 0.58922(12) 0.0401(6) Uani 1 1 d . . . 
H57A H 0.1110 0.6292 0.5737 0.060 Uiso 1 1 calc R . . 
H57B H 0.1630 0.6717 0.5880 0.060 Uiso 1 1 calc R . . 
H57C H 0.1436 0.5807 0.6285 0.060 Uiso 1 1 calc R . . 
C58 C 0.20825(8) 0.4709(2) 0.57455(12) 0.0417(7) Uani 1 1 d . . . 
H58A H 0.2116 0.4467 0.6143 0.062 Uiso 1 1 calc R . . 
H58B H 0.2280 0.5376 0.5712 0.062 Uiso 1 1 calc R . . 
H58C H 0.2170 0.4072 0.5516 0.062 Uiso 1 1 calc R . . 
C59 C 0.03322(7) 0.20977(19) 0.45881(10) 0.0252(5) Uani 1 1 d . . . 
H59 H 0.0370 0.2558 0.4245 0.030 Uiso 1 1 calc R . . 
C60 C 0.04456(8) 0.0817(2) 0.44711(11) 0.0323(6) Uani 1 1 d . . . 
H60A H 0.0764 0.0759 0.4409 0.048 Uiso 1 1 calc R . . 
H60B H 0.0242 0.0544 0.4133 0.048 Uiso 1 1 calc R . . 
H60C H 0.0402 0.0342 0.4797 0.048 Uiso 1 1 calc R . . 
C61 C -0.01757(8) 0.2233(2) 0.46865(11) 0.0326(6) Uani 1 1 d . . . 
H61A H -0.0227 0.1757 0.5009 0.049 Uiso 1 1 calc R . . 
H61B H -0.0382 0.1984 0.4346 0.049 Uiso 1 1 calc R . . 
H61C H -0.0236 0.3044 0.4765 0.049 Uiso 1 1 calc R . . 
C62 C 0.09428(8) 0.66928(19) 0.42528(11) 0.0298(5) Uani 1 1 d . . . 
H62A H 0.1270 0.6696 0.4231 0.045 Uiso 1 1 calc R . . 
H62B H 0.0897 0.6917 0.4635 0.045 Uiso 1 1 calc R . . 
H62C H 0.0784 0.7241 0.3977 0.045 Uiso 1 1 calc R . . 
C63 C 0.00664(8) 0.5228(2) 0.41073(10) 0.0274(5) Uani 1 1 d . . . 
H63A H -0.0078 0.5814 0.3842 0.041 Uiso 1 1 calc R . . 
H63B H 0.0014 0.5418 0.4491 0.041 Uiso 1 1 calc R . . 
H63C H -0.0067 0.4471 0.3998 0.041 Uiso 1 1 calc R . . 
C64 C 0.17998(7) 0.33041(18) 0.38693(9) 0.0222(5) Uani 1 1 d . . . 
C65 C 0.21049(7) 0.40442(19) 0.41879(10) 0.0251(5) Uani 1 1 d . . . 
H65 H 0.2031 0.4586 0.4457 0.030 Uiso 1 1 calc R . . 
C66 C 0.25391(8) 0.29797(19) 0.36463(10) 0.0271(5) Uani 1 1 d . . . 
H66 H 0.2789 0.2678 0.3488 0.033 Uiso 1 1 calc R . . 
C67 C 0.29759(8) 0.4466(2) 0.43205(11) 0.0331(6) Uani 1 1 d . . . 
C68 C 0.28584(9) 0.5732(2) 0.44837(14) 0.0455(7) Uani 1 1 d . . . 
H68A H 0.2686 0.6119 0.4152 0.068 Uiso 1 1 calc R . . 
H68B H 0.3142 0.6157 0.4611 0.068 Uiso 1 1 calc R . . 
H68C H 0.2674 0.5711 0.4789 0.068 Uiso 1 1 calc R . . 
C69 C 0.31767(9) 0.3778(3) 0.48585(13) 0.0462(7) Uani 1 1 d . . . 
H69A H 0.2961 0.3796 0.5129 0.069 Uiso 1 1 calc R . . 
H69B H 0.3467 0.4126 0.5031 0.069 Uiso 1 1 calc R . . 
H69C H 0.3229 0.2976 0.4755 0.069 Uiso 1 1 calc R . . 
C70 C 0.33176(9) 0.4517(2) 0.38895(13) 0.0452(7) Uani 1 1 d . . . 
H70A H 0.3379 0.3732 0.3768 0.068 Uiso 1 1 calc R . . 
H70B H 0.3604 0.4874 0.4070 0.068 Uiso 1 1 calc R . . 
H70C H 0.3185 0.4975 0.3560 0.068 Uiso 1 1 calc R . . 
C71 C 0.19030(8) 0.17223(19) 0.31092(10) 0.0254(5) Uani 1 1 d . . . 
C72 C 0.17491(8) 0.0659(2) 0.34324(10) 0.0307(5) Uani 1 1 d . . . 
H72A H 0.2013 0.0344 0.3686 0.046 Uiso 1 1 calc R . . 
H72B H 0.1623 0.0065 0.3159 0.046 Uiso 1 1 calc R . . 
H72C H 0.1514 0.0898 0.3655 0.046 Uiso 1 1 calc R . . 
C73 C 0.22879(9) 0.1353(2) 0.27724(11) 0.0366(6) Uani 1 1 d . . . 
H73A H 0.2373 0.2012 0.2554 0.055 Uiso 1 1 calc R . . 
H73B H 0.2177 0.0722 0.2514 0.055 Uiso 1 1 calc R . . 
H73C H 0.2555 0.1093 0.3037 0.055 Uiso 1 1 calc R . . 
C74 C 0.14950(8) 0.2210(2) 0.26825(10) 0.0310(5) Uani 1 1 d . . . 
H74A H 0.1252 0.2461 0.2889 0.046 Uiso 1 1 calc R . . 
H74B H 0.1377 0.1607 0.2411 0.046 Uiso 1 1 calc R . . 
H74C H 0.1599 0.2868 0.2480 0.046 Uiso 1 1 calc R . . 
  
loop_ 
 _atom_site_aniso_label 
 _atom_site_aniso_U_11 
 _atom_site_aniso_U_22 
 _atom_site_aniso_U_33 
 _atom_site_aniso_U_23 
 _atom_site_aniso_U_13 
 _atom_site_aniso_U_12 
Si1 0.0214(3) 0.0200(3) 0.0178(3) 0.0009(2) 0.0029(2) -0.0010(2) 
Si2 0.0269(3) 0.0262(3) 0.0201(4) 0.0021(2) 0.0049(3) 0.0045(3) 
Si3 0.0220(3) 0.0194(3) 0.0156(3) 0.0004(2) 0.0012(2) -0.0008(2) 
Si4 0.0244(3) 0.0190(3) 0.0165(3) -0.0006(2) 0.0022(2) -0.0010(2) 
N1 0.0220(9) 0.0209(9) 0.0171(10) 0.0026(7) 0.0033(8) 0.0004(7) 
N2 0.0241(9) 0.0230(9) 0.0171(10) 0.0019(7) 0.0033(8) 0.0011(7) 
N3 0.0198(9) 0.0270(10) 0.0260(11) -0.0009(8) 0.0014(8) -0.0003(8) 
N4 0.0232(9) 0.0212(9) 0.0209(10) 0.0010(7) 0.0028(8) 0.0009(7) 
N5 0.0224(9) 0.0208(9) 0.0161(10) 0.0002(7) 0.0005(8) 0.0002(7) 
N6 0.0235(9) 0.0203(9) 0.0149(10) 0.0006(7) 0.0004(8) -0.0018(7) 
N7 0.0216(10) 0.0271(10) 0.0281(11) 0.0017(8) 0.0001(8) -0.0009(8) 
N8 0.0253(10) 0.0220(9) 0.0212(11) 0.0007(7) 0.0027(8) 0.0032(8) 
C1 0.0242(11) 0.0248(11) 0.0193(12) 0.0014(9) 0.0033(9) 0.0020(9) 
C2 0.0264(12) 0.0225(11) 0.0246(13) 0.0021(9) 0.0037(10) 0.0000(9) 
C3 0.0307(13) 0.0406(14) 0.0289(14) 0.0088(11) 0.0051(11) -0.0071(11) 
C4 0.0441(16) 0.0629(19) 0.0227(15) 0.0148(12) 0.0040(12) -0.0107(13) 
C5 0.0368(14) 0.0640(18) 0.0201(14) 0.0049(12) -0.0054(11) -0.0138(13) 
C6 0.0243(12) 0.0358(13) 0.0250(14) 0.0014(10) 0.0025(10) -0.0046(10) 
C7 0.0277(12) 0.0390(14) 0.0282(14) 0.0003(11) 0.0026(11) -0.0091(11) 
C8 0.0493(17) 0.0518(18) 0.054(2) -0.0130(14) 0.0152(15) -0.0154(14) 
C9 0.0315(14) 0.0536(17) 0.0407(17) 0.0037(13) 0.0050(12) -0.0098(12) 
C10 0.0309(13) 0.0273(12) 0.0275(14) 0.0037(10) 0.0012(10) -0.0049(10) 
C11 0.0596(18) 0.0285(14) 0.0436(18) 0.0000(12) 0.0010(14) -0.0097(12) 
C12 0.0311(13) 0.0419(15) 0.0424(17) 0.0121(12) 0.0038(12) -0.0055(11) 
C13 0.0205(11) 0.0249(11) 0.0188(12) 0.0023(9) 0.0042(9) 0.0025(9) 
C14 0.0253(11) 0.0255(12) 0.0222(13) 0.0013(9) 0.0023(10) 0.0011(9) 
C15 0.0342(13) 0.0264(12) 0.0273(14) 0.0060(10) 0.0057(11) -0.0049(10) 
C16 0.0411(14) 0.0361(14) 0.0194(13) 0.0073(10) 0.0035(11) -0.0011(11) 
C17 0.0334(13) 0.0361(13) 0.0197(13) -0.0013(10) -0.0005(10) 0.0000(11) 
C18 0.0233(11) 0.0290(12) 0.0214(13) -0.0001(9) 0.0026(10) -0.0001(9) 
C19 0.0328(13) 0.0330(13) 0.0219(13) -0.0050(10) 0.0048(10) -0.0082(10) 
C20 0.0662(19) 0.0328(14) 0.0432(18) -0.0123(12) 0.0216(15) -0.0153(13) 
C21 0.0331(14) 0.075(2) 0.0274(16) 0.0042(13) -0.0038(12) -0.0187(14) 
C22 0.0266(12) 0.0275(12) 0.0208(13) 0.0024(9) 0.0022(10) -0.0041(9) 
C23 0.0305(13) 0.0421(15) 0.0278(14) 0.0034(11) 0.0038(11) -0.0079(11) 
C24 0.0385(14) 0.0305(13) 0.0288(14) -0.0025(10) 0.0039(11) -0.0018(11) 
C25 0.0577(17) 0.0292(13) 0.0349(16) -0.0011(11) 0.0116(13) 0.0084(12) 
C26 0.0330(14) 0.0595(18) 0.0278(15) 0.0053(12) 0.0076(11) 0.0106(12) 
C27 0.0237(11) 0.0199(11) 0.0186(12) 0.0008(8) 0.0017(9) 0.0010(9) 
C28 0.0239(11) 0.0249(12) 0.0229(13) 0.0004(9) 0.0039(10) 0.0026(9) 
C29 0.0237(11) 0.0255(12) 0.0274(13) 0.0008(9) 0.0052(10) 0.0032(9) 
C30 0.0239(12) 0.0353(13) 0.0307(15) -0.0079(10) 0.0009(10) -0.0040(10) 
C31 0.0358(14) 0.0370(15) 0.0456(18) -0.0111(12) -0.0010(12) -0.0051(11) 
C32 0.0325(14) 0.0479(16) 0.0363(16) -0.0077(12) -0.0070(12) 0.0060(12) 
C33 0.0292(14) 0.0581(18) 0.0479(19) -0.0128(14) 0.0082(13) -0.0142(12) 
C34 0.0289(12) 0.0229(11) 0.0240(13) -0.0053(9) 0.0019(10) 0.0004(9) 
C35 0.0380(14) 0.0337(14) 0.0375(16) -0.0127(11) 0.0127(12) -0.0017(11) 
C36 0.0420(14) 0.0330(13) 0.0231(14) -0.0049(10) 0.0012(11) 0.0014(11) 
C37 0.0341(13) 0.0231(12) 0.0392(16) -0.0043(10) 0.0040(11) -0.0026(10) 
C38 0.0247(11) 0.0175(10) 0.0171(12) 0.0020(8) 0.0028(9) 0.0049(8) 
C39 0.0277(12) 0.0184(11) 0.0201(12) 0.0008(8) 0.0039(9) 0.0041(9) 
C40 0.0327(13) 0.0249(12) 0.0249(13) 0.0065(9) 0.0087(10) 0.0007(10) 
C41 0.0422(14) 0.0312(13) 0.0163(13) 0.0043(9) 0.0017(11) 0.0042(11) 
C42 0.0337(13) 0.0250(12) 0.0182(12) -0.0011(9) -0.0015(10) 0.0009(10) 
C43 0.0280(12) 0.0185(11) 0.0190(12) -0.0009(8) 0.0016(9) 0.0026(9) 
C44 0.0301(12) 0.0249(12) 0.0213(13) 0.0009(9) -0.0012(10) -0.0029(9) 
C45 0.0509(16) 0.0287(14) 0.0454(18) -0.0033(12) 0.0085(13) -0.0089(12) 
C46 0.0303(13) 0.0396(15) 0.0444(17) 0.0035(12) 0.0039(12) -0.0049(11) 
C47 0.0256(12) 0.0251(12) 0.0253(13) 0.0043(9) 0.0040(10) -0.0020(9) 
C48 0.0348(13) 0.0261(13) 0.0372(16) 0.0015(10) 0.0036(11) -0.0029(10) 
C49 0.0291(13) 0.0319(13) 0.0387(16) 0.0069(11) 0.0056(11) -0.0005(10) 
C50 0.0241(11) 0.0216(11) 0.0156(12) 0.0010(8) 0.0023(9) 0.0014(9) 
C51 0.0268(11) 0.0196(11) 0.0192(12) -0.0009(8) 0.0028(9) -0.0002(9) 
C52 0.0367(13) 0.0246(12) 0.0240(13) 0.0019(9) 0.0044(11) -0.0071(10) 
C53 0.0448(15) 0.0338(13) 0.0189(13) 0.0065(10) 0.0048(11) -0.0045(11) 
C54 0.0382(14) 0.0341(13) 0.0170(13) -0.0003(10) -0.0045(10) -0.0056(11) 
C55 0.0275(12) 0.0262(12) 0.0202(13) -0.0002(9) 0.0005(10) -0.0021(9) 
C56 0.0354(13) 0.0322(13) 0.0191(13) -0.0007(10) 0.0004(10) -0.0101(10) 
C57 0.0529(16) 0.0315(14) 0.0346(16) -0.0055(11) 0.0030(13) -0.0136(12) 
C58 0.0342(14) 0.0574(18) 0.0309(16) 0.0004(12) -0.0023(12) -0.0133(13) 
C59 0.0292(12) 0.0238(11) 0.0223(13) -0.0002(9) 0.0035(10) -0.0050(9) 
C60 0.0380(14) 0.0278(13) 0.0304(15) -0.0049(10) 0.0032(11) -0.0049(10) 
C61 0.0299(13) 0.0328(13) 0.0349(15) -0.0053(11) 0.0043(11) -0.0061(10) 
C62 0.0370(13) 0.0247(12) 0.0281(14) -0.0024(10) 0.0061(11) -0.0017(10) 
C63 0.0292(12) 0.0272(12) 0.0261(14) -0.0018(9) 0.0053(10) 0.0019(10) 
C64 0.0263(11) 0.0212(11) 0.0183(12) 0.0033(8) 0.0015(9) 0.0024(9) 
C65 0.0260(12) 0.0261(12) 0.0224(13) -0.0002(9) 0.0018(10) 0.0032(9) 
C66 0.0245(12) 0.0275(12) 0.0297(14) 0.0016(10) 0.0055(10) 0.0057(9) 
C67 0.0255(12) 0.0324(13) 0.0390(16) -0.0027(11) -0.0021(11) -0.0046(10) 
C68 0.0365(15) 0.0379(15) 0.060(2) -0.0148(13) 0.0020(14) -0.0083(12) 
C69 0.0334(14) 0.0540(18) 0.0459(19) -0.0007(14) -0.0104(13) -0.0042(13) 
C70 0.0314(14) 0.0454(16) 0.060(2) -0.0048(14) 0.0110(13) -0.0096(12) 
C71 0.0306(12) 0.0229(11) 0.0218(13) -0.0026(9) 0.0016(10) 0.0032(9) 
C72 0.0351(13) 0.0252(12) 0.0299(14) -0.0013(10) -0.0005(11) 0.0016(10) 
C73 0.0415(15) 0.0369(14) 0.0319(15) -0.0070(11) 0.0072(12) 0.0065(11) 
C74 0.0396(14) 0.0314(13) 0.0203(13) -0.0042(10) -0.0002(11) 0.0036(11) 
  
_geom_special_details 
; 
 All esds (except the esd in the dihedral angle between two l.s. planes) 
 are estimated using the full covariance matrix.  The cell esds are taken 
 into account individually in the estimation of esds in distances, angles 
 and torsion angles; correlations between esds in cell parameters are only 
 used when they are defined by crystal symmetry.  An approximate (isotropic) 
 treatment of cell esds is used for estimating esds involving l.s. planes. 
; 
  
loop_ 
 _geom_bond_atom_site_label_1 
 _geom_bond_atom_site_label_2 
 _geom_bond_distance 
 _geom_bond_site_symmetry_2 
 _geom_bond_publ_flag 
Si1 N2 1.7298(18) . ? 
Si1 N1 1.7402(18) . ? 
Si1 C27 1.852(2) . ? 
Si1 Si2 2.5339(9) . ? 
Si2 N2 1.7405(19) . ? 
Si2 N1 1.7565(18) . ? 
Si2 C26 1.852(3) . ? 
Si2 C25 1.861(3) . ? 
Si3 N5 1.7316(18) . ? 
Si3 N6 1.7386(18) . ? 
Si3 C64 1.851(2) . ? 
Si3 Si4 2.5347(9) . ? 
Si4 N5 1.7466(19) . ? 
Si4 N6 1.7552(18) . ? 
Si4 C63 1.856(2) . ? 
Si4 C62 1.857(2) . ? 
N1 C13 1.437(3) . ? 
N2 C1 1.433(3) . ? 
N3 C29 1.369(3) . ? 
N3 C28 1.377(3) . ? 
N3 C30 1.493(3) . ? 
N4 C29 1.352(3) . ? 
N4 C27 1.422(3) . ? 
N4 C34 1.493(3) . ? 
N5 C38 1.425(3) . ? 
N6 C50 1.433(3) . ? 
N7 C66 1.368(3) . ? 
N7 C65 1.376(3) . ? 
N7 C67 1.488(3) . ? 
N8 C66 1.359(3) . ? 
N8 C64 1.424(3) . ? 
N8 C71 1.493(3) . ? 
C1 C6 1.409(3) . ? 
C1 C2 1.415(3) . ? 
C2 C3 1.383(3) . ? 
C2 C10 1.523(3) . ? 
C3 C4 1.373(3) . ? 
C3 H3 0.9300 . ? 
C4 C5 1.385(4) . ? 
C4 H4 0.9300 . ? 
C5 C6 1.389(3) . ? 
C5 H5 0.9300 . ? 
C6 C7 1.526(3) . ? 
C7 C9 1.529(3) . ? 
C7 C8 1.530(4) . ? 
C7 H7 0.9800 . ? 
C8 H8A 0.9600 . ? 
C8 H8B 0.9600 . ? 
C8 H8C 0.9600 . ? 
C9 H9A 0.9600 . ? 
C9 H9B 0.9600 . ? 
C9 H9C 0.9600 . ? 
C10 C11 1.532(3) . ? 
C10 C12 1.533(3) . ? 
C10 H10 0.9800 . ? 
C11 H11A 0.9600 . ? 
C11 H11B 0.9600 . ? 
C11 H11C 0.9600 . ? 
C12 H12A 0.9600 . ? 
C12 H12B 0.9600 . ? 
C12 H12C 0.9600 . ? 
C13 C18 1.413(3) . ? 
C13 C14 1.418(3) . ? 
C14 C15 1.393(3) . ? 
C14 C22 1.521(3) . ? 
C15 C16 1.377(3) . ? 
C15 H15 0.9300 . ? 
C16 C17 1.379(3) . ? 
C16 H16 0.9300 . ? 
C17 C18 1.388(3) . ? 
C17 H17 0.9300 . ? 
C18 C19 1.521(3) . ? 
C19 C21 1.524(3) . ? 
C19 C20 1.531(3) . ? 
C19 H19 0.9800 . ? 
C20 H20A 0.9600 . ? 
C20 H20B 0.9600 . ? 
C20 H20C 0.9600 . ? 
C21 H21A 0.9600 . ? 
C21 H21B 0.9600 . ? 
C21 H21C 0.9600 . ? 
C22 C24 1.529(3) . ? 
C22 C23 1.532(3) . ? 
C22 H22 0.9800 . ? 
C23 H23A 0.9600 . ? 
C23 H23B 0.9600 . ? 
C23 H23C 0.9600 . ? 
C24 H24A 0.9600 . ? 
C24 H24B 0.9600 . ? 
C24 H24C 0.9600 . ? 
C25 H25A 0.9600 . ? 
C25 H25B 0.9600 . ? 
C25 H25C 0.9600 . ? 
C26 H26A 0.9600 . ? 
C26 H26B 0.9600 . ? 
C26 H26C 0.9600 . ? 
C27 C28 1.354(3) . ? 
C28 H28 0.9300 . ? 
C29 H29 0.9300 . ? 
C30 C32 1.520(4) . ? 
C30 C33 1.523(3) . ? 
C30 C31 1.530(3) . ? 
C31 H31A 0.9600 . ? 
C31 H31B 0.9600 . ? 
C31 H31C 0.9600 . ? 
C32 H32A 0.9600 . ? 
C32 H32B 0.9600 . ? 
C32 H32C 0.9600 . ? 
C33 H33A 0.9600 . ? 
C33 H33B 0.9600 . ? 
C33 H33C 0.9600 . ? 
C34 C35 1.523(3) . ? 
C34 C37 1.529(3) . ? 
C34 C36 1.530(3) . ? 
C35 H35A 0.9600 . ? 
C35 H35B 0.9600 . ? 
C35 H35C 0.9600 . ? 
C36 H36A 0.9600 . ? 
C36 H36B 0.9600 . ? 
C36 H36C 0.9600 . ? 
C37 H37A 0.9600 . ? 
C37 H37B 0.9600 . ? 
C37 H37C 0.9600 . ? 
C38 C43 1.414(3) . ? 
C38 C39 1.416(3) . ? 
C39 C40 1.390(3) . ? 
C39 C47 1.525(3) . ? 
C40 C41 1.380(3) . ? 
C40 H40 0.9300 . ? 
C41 C42 1.377(3) . ? 
C41 H41 0.9300 . ? 
C42 C43 1.389(3) . ? 
C42 H42 0.9300 . ? 
C43 C44 1.519(3) . ? 
C44 C45 1.527(3) . ? 
C44 C46 1.530(3) . ? 
C44 H44 0.9800 . ? 
C45 H45A 0.9600 . ? 
C45 H45B 0.9600 . ? 
C45 H45C 0.9600 . ? 
C46 H46A 0.9600 . ? 
C46 H46B 0.9600 . ? 
C46 H46C 0.9600 . ? 
C47 C49 1.530(3) . ? 
C47 C48 1.532(3) . ? 
C47 H47 0.9800 . ? 
C48 H48A 0.9600 . ? 
C48 H48B 0.9600 . ? 
C48 H48C 0.9600 . ? 
C49 H49A 0.9600 . ? 
C49 H49B 0.9600 . ? 
C49 H49C 0.9600 . ? 
C50 C55 1.412(3) . ? 
C50 C51 1.414(3) . ? 
C51 C52 1.390(3) . ? 
C51 C59 1.522(3) . ? 
C52 C53 1.377(3) . ? 
C52 H52 0.9300 . ? 
C53 C54 1.379(3) . ? 
C53 H53 0.9300 . ? 
C54 C55 1.389(3) . ? 
C54 H54 0.9300 . ? 
C55 C56 1.522(3) . ? 
C56 C58 1.529(3) . ? 
C56 C57 1.532(3) . ? 
C56 H56 0.9800 . ? 
C57 H57A 0.9600 . ? 
C57 H57B 0.9600 . ? 
C57 H57C 0.9600 . ? 
C58 H58A 0.9600 . ? 
C58 H58B 0.9600 . ? 
C58 H58C 0.9600 . ? 
C59 C60 1.525(3) . ? 
C59 C61 1.535(3) . ? 
C59 H59 0.9800 . ? 
C60 H60A 0.9600 . ? 
C60 H60B 0.9600 . ? 
C60 H60C 0.9600 . ? 
C61 H61A 0.9600 . ? 
C61 H61B 0.9600 . ? 
C61 H61C 0.9600 . ? 
C62 H62A 0.9600 . ? 
C62 H62B 0.9600 . ? 
C62 H62C 0.9600 . ? 
C63 H63A 0.9600 . ? 
C63 H63B 0.9600 . ? 
C63 H63C 0.9600 . ? 
C64 C65 1.355(3) . ? 
C65 H65 0.9300 . ? 
C66 H66 0.9300 . ? 
C67 C69 1.518(4) . ? 
C67 C70 1.525(4) . ? 
C67 C68 1.540(3) . ? 
C68 H68A 0.9600 . ? 
C68 H68B 0.9600 . ? 
C68 H68C 0.9600 . ? 
C69 H69A 0.9600 . ? 
C69 H69B 0.9600 . ? 
C69 H69C 0.9600 . ? 
C70 H70A 0.9600 . ? 
C70 H70B 0.9600 . ? 
C70 H70C 0.9600 . ? 
C71 C73 1.525(3) . ? 
C71 C74 1.526(3) . ? 
C71 C72 1.529(3) . ? 
C72 H72A 0.9600 . ? 
C72 H72B 0.9600 . ? 
C72 H72C 0.9600 . ? 
C73 H73A 0.9600 . ? 
C73 H73B 0.9600 . ? 
C73 H73C 0.9600 . ? 
C74 H74A 0.9600 . ? 
C74 H74B 0.9600 . ? 
C74 H74C 0.9600 . ? 
  
loop_ 
 _geom_angle_atom_site_label_1 
 _geom_angle_atom_site_label_2 
 _geom_angle_atom_site_label_3 
 _geom_angle 
 _geom_angle_site_symmetry_1 
 _geom_angle_site_symmetry_3 
 _geom_angle_publ_flag 
N2 Si1 N1 87.02(9) . . ? 
N2 Si1 C27 117.59(9) . . ? 
N1 Si1 C27 113.91(10) . . ? 
N2 Si1 Si2 43.26(6) . . ? 
N1 Si1 Si2 43.82(6) . . ? 
C27 Si1 Si2 128.65(7) . . ? 
N2 Si2 N1 86.18(9) . . ? 
N2 Si2 C26 117.13(11) . . ? 
N1 Si2 C26 113.37(11) . . ? 
N2 Si2 C25 112.44(11) . . ? 
N1 Si2 C25 118.67(11) . . ? 
C26 Si2 C25 108.11(13) . . ? 
N2 Si2 Si1 42.93(6) . . ? 
N1 Si2 Si1 43.31(6) . . ? 
C26 Si2 Si1 123.90(9) . . ? 
C25 Si2 Si1 127.96(9) . . ? 
N5 Si3 N6 87.18(9) . . ? 
N5 Si3 C64 115.42(9) . . ? 
N6 Si3 C64 114.88(10) . . ? 
N5 Si3 Si4 43.45(6) . . ? 
N6 Si3 Si4 43.75(6) . . ? 
C64 Si3 Si4 126.94(7) . . ? 
N5 Si4 N6 86.21(8) . . ? 
N5 Si4 C63 116.72(10) . . ? 
N6 Si4 C63 114.74(10) . . ? 
N5 Si4 C62 113.69(10) . . ? 
N6 Si4 C62 116.02(10) . . ? 
C63 Si4 C62 108.37(11) . . ? 
N5 Si4 Si3 42.99(6) . . ? 
N6 Si4 Si3 43.23(6) . . ? 
C63 Si4 Si3 125.49(8) . . ? 
C62 Si4 Si3 126.13(8) . . ? 
C13 N1 Si1 132.98(14) . . ? 
C13 N1 Si2 131.80(14) . . ? 
Si1 N1 Si2 92.88(9) . . ? 
C1 N2 Si1 134.12(15) . . ? 
C1 N2 Si2 132.07(14) . . ? 
Si1 N2 Si2 93.80(9) . . ? 
C29 N3 C28 111.22(18) . . ? 
C29 N3 C30 123.61(18) . . ? 
C28 N3 C30 125.02(19) . . ? 
C29 N4 C27 112.72(18) . . ? 
C29 N4 C34 122.93(18) . . ? 
C27 N4 C34 124.34(17) . . ? 
C38 N5 Si3 132.32(14) . . ? 
C38 N5 Si4 134.11(14) . . ? 
Si3 N5 Si4 93.56(9) . . ? 
C50 N6 Si3 130.46(14) . . ? 
C50 N6 Si4 132.40(14) . . ? 
Si3 N6 Si4 93.02(9) . . ? 
C66 N7 C65 111.78(18) . . ? 
C66 N7 C67 123.04(19) . . ? 
C65 N7 C67 125.0(2) . . ? 
C66 N8 C64 112.66(18) . . ? 
C66 N8 C71 123.06(18) . . ? 
C64 N8 C71 124.28(17) . . ? 
C6 C1 C2 119.7(2) . . ? 
C6 C1 N2 119.72(19) . . ? 
C2 C1 N2 120.55(19) . . ? 
C3 C2 C1 119.1(2) . . ? 
C3 C2 C10 117.7(2) . . ? 
C1 C2 C10 123.2(2) . . ? 
C4 C3 C2 121.7(2) . . ? 
C4 C3 H3 119.2 . . ? 
C2 C3 H3 119.2 . . ? 
C3 C4 C5 119.1(2) . . ? 
C3 C4 H4 120.5 . . ? 
C5 C4 H4 120.5 . . ? 
C4 C5 C6 121.9(2) . . ? 
C4 C5 H5 119.0 . . ? 
C6 C5 H5 119.0 . . ? 
C5 C6 C1 118.5(2) . . ? 
C5 C6 C7 118.8(2) . . ? 
C1 C6 C7 122.8(2) . . ? 
C6 C7 C9 112.2(2) . . ? 
C6 C7 C8 110.7(2) . . ? 
C9 C7 C8 110.1(2) . . ? 
C6 C7 H7 107.9 . . ? 
C9 C7 H7 107.9 . . ? 
C8 C7 H7 107.9 . . ? 
C7 C8 H8A 109.5 . . ? 
C7 C8 H8B 109.5 . . ? 
H8A C8 H8B 109.5 . . ? 
C7 C8 H8C 109.5 . . ? 
H8A C8 H8C 109.5 . . ? 
H8B C8 H8C 109.5 . . ? 
C7 C9 H9A 109.5 . . ? 
C7 C9 H9B 109.5 . . ? 
H9A C9 H9B 109.5 . . ? 
C7 C9 H9C 109.5 . . ? 
H9A C9 H9C 109.5 . . ? 
H9B C9 H9C 109.5 . . ? 
C2 C10 C11 111.5(2) . . ? 
C2 C10 C12 110.7(2) . . ? 
C11 C10 C12 110.3(2) . . ? 
C2 C10 H10 108.1 . . ? 
C11 C10 H10 108.1 . . ? 
C12 C10 H10 108.1 . . ? 
C10 C11 H11A 109.5 . . ? 
C10 C11 H11B 109.5 . . ? 
H11A C11 H11B 109.5 . . ? 
C10 C11 H11C 109.5 . . ? 
H11A C11 H11C 109.5 . . ? 
H11B C11 H11C 109.5 . . ? 
C10 C12 H12A 109.5 . . ? 
C10 C12 H12B 109.5 . . ? 
H12A C12 H12B 109.5 . . ? 
C10 C12 H12C 109.5 . . ? 
H12A C12 H12C 109.5 . . ? 
H12B C12 H12C 109.5 . . ? 
C18 C13 C14 118.8(2) . . ? 
C18 C13 N1 120.39(19) . . ? 
C14 C13 N1 120.82(19) . . ? 
C15 C14 C13 119.1(2) . . ? 
C15 C14 C22 117.7(2) . . ? 
C13 C14 C22 123.2(2) . . ? 
C16 C15 C14 122.0(2) . . ? 
C16 C15 H15 119.0 . . ? 
C14 C15 H15 119.0 . . ? 
C15 C16 C17 118.6(2) . . ? 
C15 C16 H16 120.7 . . ? 
C17 C16 H16 120.7 . . ? 
C16 C17 C18 122.2(2) . . ? 
C16 C17 H17 118.9 . . ? 
C18 C17 H17 118.9 . . ? 
C17 C18 C13 119.3(2) . . ? 
C17 C18 C19 117.4(2) . . ? 
C13 C18 C19 123.3(2) . . ? 
C18 C19 C21 110.8(2) . . ? 
C18 C19 C20 111.27(19) . . ? 
C21 C19 C20 110.1(2) . . ? 
C18 C19 H19 108.2 . . ? 
C21 C19 H19 108.2 . . ? 
C20 C19 H19 108.2 . . ? 
C19 C20 H20A 109.5 . . ? 
C19 C20 H20B 109.5 . . ? 
H20A C20 H20B 109.5 . . ? 
C19 C20 H20C 109.5 . . ? 
H20A C20 H20C 109.5 . . ? 
H20B C20 H20C 109.5 . . ? 
C19 C21 H21A 109.5 . . ? 
C19 C21 H21B 109.5 . . ? 
H21A C21 H21B 109.5 . . ? 
C19 C21 H21C 109.5 . . ? 
H21A C21 H21C 109.5 . . ? 
H21B C21 H21C 109.5 . . ? 
C14 C22 C24 110.31(18) . . ? 
C14 C22 C23 111.47(19) . . ? 
C24 C22 C23 111.04(19) . . ? 
C14 C22 H22 108.0 . . ? 
C24 C22 H22 108.0 . . ? 
C23 C22 H22 108.0 . . ? 
C22 C23 H23A 109.5 . . ? 
C22 C23 H23B 109.5 . . ? 
H23A C23 H23B 109.5 . . ? 
C22 C23 H23C 109.5 . . ? 
H23A C23 H23C 109.5 . . ? 
H23B C23 H23C 109.5 . . ? 
C22 C24 H24A 109.5 . . ? 
C22 C24 H24B 109.5 . . ? 
H24A C24 H24B 109.5 . . ? 
C22 C24 H24C 109.5 . . ? 
H24A C24 H24C 109.5 . . ? 
H24B C24 H24C 109.5 . . ? 
Si2 C25 H25A 109.5 . . ? 
Si2 C25 H25B 109.5 . . ? 
H25A C25 H25B 109.5 . . ? 
Si2 C25 H25C 109.5 . . ? 
H25A C25 H25C 109.5 . . ? 
H25B C25 H25C 109.5 . . ? 
Si2 C26 H26A 109.5 . . ? 
Si2 C26 H26B 109.5 . . ? 
H26A C26 H26B 109.5 . . ? 
Si2 C26 H26C 109.5 . . ? 
H26A C26 H26C 109.5 . . ? 
H26B C26 H26C 109.5 . . ? 
C28 C27 N4 103.68(18) . . ? 
C28 C27 Si1 122.23(16) . . ? 
N4 C27 Si1 133.81(16) . . ? 
C27 C28 N3 108.8(2) . . ? 
C27 C28 H28 125.6 . . ? 
N3 C28 H28 125.6 . . ? 
N4 C29 N3 103.52(18) . . ? 
N4 C29 H29 128.2 . . ? 
N3 C29 H29 128.2 . . ? 
N3 C30 C32 108.08(19) . . ? 
N3 C30 C33 108.9(2) . . ? 
C32 C30 C33 110.6(2) . . ? 
N3 C30 C31 109.32(19) . . ? 
C32 C30 C31 110.5(2) . . ? 
C33 C30 C31 109.4(2) . . ? 
C30 C31 H31A 109.5 . . ? 
C30 C31 H31B 109.5 . . ? 
H31A C31 H31B 109.5 . . ? 
C30 C31 H31C 109.5 . . ? 
H31A C31 H31C 109.5 . . ? 
H31B C31 H31C 109.5 . . ? 
C30 C32 H32A 109.5 . . ? 
C30 C32 H32B 109.5 . . ? 
H32A C32 H32B 109.5 . . ? 
C30 C32 H32C 109.5 . . ? 
H32A C32 H32C 109.5 . . ? 
H32B C32 H32C 109.5 . . ? 
C30 C33 H33A 109.5 . . ? 
C30 C33 H33B 109.5 . . ? 
H33A C33 H33B 109.5 . . ? 
C30 C33 H33C 109.5 . . ? 
H33A C33 H33C 109.5 . . ? 
H33B C33 H33C 109.5 . . ? 
N4 C34 C35 109.77(18) . . ? 
N4 C34 C37 109.38(19) . . ? 
C35 C34 C37 108.77(19) . . ? 
N4 C34 C36 108.90(17) . . ? 
C35 C34 C36 108.9(2) . . ? 
C37 C34 C36 111.08(19) . . ? 
C34 C35 H35A 109.5 . . ? 
C34 C35 H35B 109.5 . . ? 
H35A C35 H35B 109.5 . . ? 
C34 C35 H35C 109.5 . . ? 
H35A C35 H35C 109.5 . . ? 
H35B C35 H35C 109.5 . . ? 
C34 C36 H36A 109.5 . . ? 
C34 C36 H36B 109.5 . . ? 
H36A C36 H36B 109.5 . . ? 
C34 C36 H36C 109.5 . . ? 
H36A C36 H36C 109.5 . . ? 
H36B C36 H36C 109.5 . . ? 
C34 C37 H37A 109.5 . . ? 
C34 C37 H37B 109.5 . . ? 
H37A C37 H37B 109.5 . . ? 
C34 C37 H37C 109.5 . . ? 
H37A C37 H37C 109.5 . . ? 
H37B C37 H37C 109.5 . . ? 
C43 C38 C39 119.9(2) . . ? 
C43 C38 N5 119.37(18) . . ? 
C39 C38 N5 120.74(19) . . ? 
C40 C39 C38 118.8(2) . . ? 
C40 C39 C47 118.48(19) . . ? 
C38 C39 C47 122.69(19) . . ? 
C41 C40 C39 121.5(2) . . ? 
C41 C40 H40 119.3 . . ? 
C39 C40 H40 119.3 . . ? 
C42 C41 C40 119.4(2) . . ? 
C42 C41 H41 120.3 . . ? 
C40 C41 H41 120.3 . . ? 
C41 C42 C43 121.9(2) . . ? 
C41 C42 H42 119.0 . . ? 
C43 C42 H42 119.0 . . ? 
C42 C43 C38 118.5(2) . . ? 
C42 C43 C44 118.7(2) . . ? 
C38 C43 C44 122.80(19) . . ? 
C43 C44 C45 111.15(19) . . ? 
C43 C44 C46 112.19(19) . . ? 
C45 C44 C46 110.5(2) . . ? 
C43 C44 H44 107.6 . . ? 
C45 C44 H44 107.6 . . ? 
C46 C44 H44 107.6 . . ? 
C44 C45 H45A 109.5 . . ? 
C44 C45 H45B 109.5 . . ? 
H45A C45 H45B 109.5 . . ? 
C44 C45 H45C 109.5 . . ? 
H45A C45 H45C 109.5 . . ? 
H45B C45 H45C 109.5 . . ? 
C44 C46 H46A 109.5 . . ? 
C44 C46 H46B 109.5 . . ? 
H46A C46 H46B 109.5 . . ? 
C44 C46 H46C 109.5 . . ? 
H46A C46 H46C 109.5 . . ? 
H46B C46 H46C 109.5 . . ? 
C39 C47 C49 110.62(19) . . ? 
C39 C47 C48 111.68(18) . . ? 
C49 C47 C48 110.90(18) . . ? 
C39 C47 H47 107.8 . . ? 
C49 C47 H47 107.8 . . ? 
C48 C47 H47 107.8 . . ? 
C47 C48 H48A 109.5 . . ? 
C47 C48 H48B 109.5 . . ? 
H48A C48 H48B 109.5 . . ? 
C47 C48 H48C 109.5 . . ? 
H48A C48 H48C 109.5 . . ? 
H48B C48 H48C 109.5 . . ? 
C47 C49 H49A 109.5 . . ? 
C47 C49 H49B 109.5 . . ? 
H49A C49 H49B 109.5 . . ? 
C47 C49 H49C 109.5 . . ? 
H49A C49 H49C 109.5 . . ? 
H49B C49 H49C 109.5 . . ? 
C55 C50 C51 118.7(2) . . ? 
C55 C50 N6 120.35(19) . . ? 
C51 C50 N6 120.92(19) . . ? 
C52 C51 C50 119.4(2) . . ? 
C52 C51 C59 117.84(19) . . ? 
C50 C51 C59 122.73(19) . . ? 
C53 C52 C51 121.8(2) . . ? 
C53 C52 H52 119.1 . . ? 
C51 C52 H52 119.1 . . ? 
C52 C53 C54 118.6(2) . . ? 
C52 C53 H53 120.7 . . ? 
C54 C53 H53 120.7 . . ? 
C53 C54 C55 122.0(2) . . ? 
C53 C54 H54 119.0 . . ? 
C55 C54 H54 119.0 . . ? 
C54 C55 C50 119.3(2) . . ? 
C54 C55 C56 117.9(2) . . ? 
C50 C55 C56 122.8(2) . . ? 
C55 C56 C58 111.3(2) . . ? 
C55 C56 C57 110.6(2) . . ? 
C58 C56 C57 110.6(2) . . ? 
C55 C56 H56 108.1 . . ? 
C58 C56 H56 108.1 . . ? 
C57 C56 H56 108.1 . . ? 
C56 C57 H57A 109.5 . . ? 
C56 C57 H57B 109.5 . . ? 
H57A C57 H57B 109.5 . . ? 
C56 C57 H57C 109.5 . . ? 
H57A C57 H57C 109.5 . . ? 
H57B C57 H57C 109.5 . . ? 
C56 C58 H58A 109.5 . . ? 
C56 C58 H58B 109.5 . . ? 
H58A C58 H58B 109.5 . . ? 
C56 C58 H58C 109.5 . . ? 
H58A C58 H58C 109.5 . . ? 
H58B C58 H58C 109.5 . . ? 
C51 C59 C60 111.49(18) . . ? 
C51 C59 C61 110.65(19) . . ? 
C60 C59 C61 111.23(18) . . ? 
C51 C59 H59 107.8 . . ? 
C60 C59 H59 107.8 . . ? 
C61 C59 H59 107.8 . . ? 
C59 C60 H60A 109.5 . . ? 
C59 C60 H60B 109.5 . . ? 
H60A C60 H60B 109.5 . . ? 
C59 C60 H60C 109.5 . . ? 
H60A C60 H60C 109.5 . . ? 
H60B C60 H60C 109.5 . . ? 
C59 C61 H61A 109.5 . . ? 
C59 C61 H61B 109.5 . . ? 
H61A C61 H61B 109.5 . . ? 
C59 C61 H61C 109.5 . . ? 
H61A C61 H61C 109.5 . . ? 
H61B C61 H61C 109.5 . . ? 
Si4 C62 H62A 109.5 . . ? 
Si4 C62 H62B 109.5 . . ? 
H62A C62 H62B 109.5 . . ? 
Si4 C62 H62C 109.5 . . ? 
H62A C62 H62C 109.5 . . ? 
H62B C62 H62C 109.5 . . ? 
Si4 C63 H63A 109.5 . . ? 
Si4 C63 H63B 109.5 . . ? 
H63A C63 H63B 109.5 . . ? 
Si4 C63 H63C 109.5 . . ? 
H63A C63 H63C 109.5 . . ? 
H63B C63 H63C 109.5 . . ? 
C65 C64 N8 103.83(18) . . ? 
C65 C64 Si3 122.02(17) . . ? 
N8 C64 Si3 133.79(16) . . ? 
C64 C65 N7 108.6(2) . . ? 
C64 C65 H65 125.7 . . ? 
N7 C65 H65 125.7 . . ? 
N8 C66 N7 103.11(18) . . ? 
N8 C66 H66 128.4 . . ? 
N7 C66 H66 128.4 . . ? 
N7 C67 C69 107.9(2) . . ? 
N7 C67 C70 109.0(2) . . ? 
C69 C67 C70 111.4(2) . . ? 
N7 C67 C68 109.46(19) . . ? 
C69 C67 C68 110.2(2) . . ? 
C70 C67 C68 108.8(2) . . ? 
C67 C68 H68A 109.5 . . ? 
C67 C68 H68B 109.5 . . ? 
H68A C68 H68B 109.5 . . ? 
C67 C68 H68C 109.5 . . ? 
H68A C68 H68C 109.5 . . ? 
H68B C68 H68C 109.5 . . ? 
C67 C69 H69A 109.5 . . ? 
C67 C69 H69B 109.5 . . ? 
H69A C69 H69B 109.5 . . ? 
C67 C69 H69C 109.5 . . ? 
H69A C69 H69C 109.5 . . ? 
H69B C69 H69C 109.5 . . ? 
C67 C70 H70A 109.5 . . ? 
C67 C70 H70B 109.5 . . ? 
H70A C70 H70B 109.5 . . ? 
C67 C70 H70C 109.5 . . ? 
H70A C70 H70C 109.5 . . ? 
H70B C70 H70C 109.5 . . ? 
N8 C71 C73 109.58(18) . . ? 
N8 C71 C74 109.55(17) . . ? 
C73 C71 C74 108.4(2) . . ? 
N8 C71 C72 109.02(19) . . ? 
C73 C71 C72 109.55(19) . . ? 
C74 C71 C72 110.69(19) . . ? 
C71 C72 H72A 109.5 . . ? 
C71 C72 H72B 109.5 . . ? 
H72A C72 H72B 109.5 . . ? 
C71 C72 H72C 109.5 . . ? 
H72A C72 H72C 109.5 . . ? 
H72B C72 H72C 109.5 . . ? 
C71 C73 H73A 109.5 . . ? 
C71 C73 H73B 109.5 . . ? 
H73A C73 H73B 109.5 . . ? 
C71 C73 H73C 109.5 . . ? 
H73A C73 H73C 109.5 . . ? 
H73B C73 H73C 109.5 . . ? 
C71 C74 H74A 109.5 . . ? 
C71 C74 H74B 109.5 . . ? 
H74A C74 H74B 109.5 . . ? 
C71 C74 H74C 109.5 . . ? 
H74A C74 H74C 109.5 . . ? 
H74B C74 H74C 109.5 . . ? 
  
loop_ 
 _geom_torsion_atom_site_label_1 
 _geom_torsion_atom_site_label_2 
 _geom_torsion_atom_site_label_3 
 _geom_torsion_atom_site_label_4 
 _geom_torsion 
 _geom_torsion_site_symmetry_1 
 _geom_torsion_site_symmetry_2 
 _geom_torsion_site_symmetry_3 
 _geom_torsion_site_symmetry_4 
 _geom_torsion_publ_flag 
N1 Si1 Si2 N2 -176.08(12) . . . . ? 
C27 Si1 Si2 N2 -90.89(13) . . . . ? 
N2 Si1 Si2 N1 176.08(12) . . . . ? 
C27 Si1 Si2 N1 85.19(12) . . . . ? 
N2 Si1 Si2 C26 -94.85(14) . . . . ? 
N1 Si1 Si2 C26 89.07(13) . . . . ? 
C27 Si1 Si2 C26 174.26(13) . . . . ? 
N2 Si1 Si2 C25 82.66(14) . . . . ? 
N1 Si1 Si2 C25 -93.42(14) . . . . ? 
C27 Si1 Si2 C25 -8.23(15) . . . . ? 
N6 Si3 Si4 N5 177.87(12) . . . . ? 
C64 Si3 Si4 N5 89.27(12) . . . . ? 
N5 Si3 Si4 N6 -177.87(12) . . . . ? 
C64 Si3 Si4 N6 -88.61(12) . . . . ? 
N5 Si3 Si4 C63 92.58(13) . . . . ? 
N6 Si3 Si4 C63 -89.54(13) . . . . ? 
C64 Si3 Si4 C63 -178.15(13) . . . . ? 
N5 Si3 Si4 C62 -86.93(13) . . . . ? 
N6 Si3 Si4 C62 90.95(13) . . . . ? 
C64 Si3 Si4 C62 2.34(14) . . . . ? 
N2 Si1 N1 C13 -166.3(2) . . . . ? 
C27 Si1 N1 C13 74.8(2) . . . . ? 
Si2 Si1 N1 C13 -163.6(2) . . . . ? 
N2 Si1 N1 Si2 -2.69(8) . . . . ? 
C27 Si1 N1 Si2 -121.65(9) . . . . ? 
N2 Si2 N1 C13 166.6(2) . . . . ? 
C26 Si2 N1 C13 48.6(2) . . . . ? 
C25 Si2 N1 C13 -79.9(2) . . . . ? 
Si1 Si2 N1 C13 163.9(2) . . . . ? 
N2 Si2 N1 Si1 2.67(8) . . . . ? 
C26 Si2 N1 Si1 -115.30(11) . . . . ? 
C25 Si2 N1 Si1 116.22(11) . . . . ? 
N1 Si1 N2 C1 -176.5(2) . . . . ? 
C27 Si1 N2 C1 -61.0(2) . . . . ? 
Si2 Si1 N2 C1 -179.2(2) . . . . ? 
N1 Si1 N2 Si2 2.72(8) . . . . ? 
C27 Si1 N2 Si2 118.23(10) . . . . ? 
N1 Si2 N2 C1 176.5(2) . . . . ? 
C26 Si2 N2 C1 -69.1(2) . . . . ? 
C25 Si2 N2 C1 57.0(2) . . . . ? 
Si1 Si2 N2 C1 179.2(2) . . . . ? 
N1 Si2 N2 Si1 -2.69(8) . . . . ? 
C26 Si2 N2 Si1 111.66(12) . . . . ? 
C25 Si2 N2 Si1 -122.21(11) . . . . ? 
N6 Si3 N5 C38 179.11(19) . . . . ? 
C64 Si3 N5 C38 62.8(2) . . . . ? 
Si4 Si3 N5 C38 -179.4(2) . . . . ? 
N6 Si3 N5 Si4 -1.47(8) . . . . ? 
C64 Si3 N5 Si4 -117.77(10) . . . . ? 
N6 Si4 N5 C38 -179.1(2) . . . . ? 
C63 Si4 N5 C38 65.0(2) . . . . ? 
C62 Si4 N5 C38 -62.3(2) . . . . ? 
Si3 Si4 N5 C38 179.4(2) . . . . ? 
N6 Si4 N5 Si3 1.46(8) . . . . ? 
C63 Si4 N5 Si3 -114.40(10) . . . . ? 
C62 Si4 N5 Si3 118.27(10) . . . . ? 
N5 Si3 N6 C50 160.27(19) . . . . ? 
C64 Si3 N6 C50 -82.9(2) . . . . ? 
Si4 Si3 N6 C50 158.8(2) . . . . ? 
N5 Si3 N6 Si4 1.47(8) . . . . ? 
C64 Si3 N6 Si4 118.27(9) . . . . ? 
N5 Si4 N6 C50 -159.58(19) . . . . ? 
C63 Si4 N6 C50 -41.8(2) . . . . ? 
C62 Si4 N6 C50 85.9(2) . . . . ? 
Si3 Si4 N6 C50 -158.1(2) . . . . ? 
N5 Si4 N6 Si3 -1.45(8) . . . . ? 
C63 Si4 N6 Si3 116.30(10) . . . . ? 
C62 Si4 N6 Si3 -116.02(10) . . . . ? 
Si1 N2 C1 C6 -92.8(3) . . . . ? 
Si2 N2 C1 C6 88.3(3) . . . . ? 
Si1 N2 C1 C2 87.6(3) . . . . ? 
Si2 N2 C1 C2 -91.3(2) . . . . ? 
C6 C1 C2 C3 -0.7(3) . . . . ? 
N2 C1 C2 C3 178.8(2) . . . . ? 
C6 C1 C2 C10 177.6(2) . . . . ? 
N2 C1 C2 C10 -2.8(3) . . . . ? 
C1 C2 C3 C4 -0.2(4) . . . . ? 
C10 C2 C3 C4 -178.6(2) . . . . ? 
C2 C3 C4 C5 1.0(4) . . . . ? 
C3 C4 C5 C6 -0.8(4) . . . . ? 
C4 C5 C6 C1 -0.1(4) . . . . ? 
C4 C5 C6 C7 179.5(3) . . . . ? 
C2 C1 C6 C5 0.8(3) . . . . ? 
N2 C1 C6 C5 -178.7(2) . . . . ? 
C2 C1 C6 C7 -178.7(2) . . . . ? 
N2 C1 C6 C7 1.7(3) . . . . ? 
C5 C6 C7 C9 60.9(3) . . . . ? 
C1 C6 C7 C9 -119.5(3) . . . . ? 
C5 C6 C7 C8 -62.6(3) . . . . ? 
C1 C6 C7 C8 117.0(3) . . . . ? 
C3 C2 C10 C11 -57.6(3) . . . . ? 
C1 C2 C10 C11 124.1(2) . . . . ? 
C3 C2 C10 C12 65.7(3) . . . . ? 
C1 C2 C10 C12 -112.7(2) . . . . ? 
Si1 N1 C13 C18 -121.7(2) . . . . ? 
Si2 N1 C13 C18 80.6(3) . . . . ? 
Si1 N1 C13 C14 57.9(3) . . . . ? 
Si2 N1 C13 C14 -99.8(2) . . . . ? 
C18 C13 C14 C15 1.4(3) . . . . ? 
N1 C13 C14 C15 -178.17(19) . . . . ? 
C18 C13 C14 C22 -179.50(19) . . . . ? 
N1 C13 C14 C22 0.9(3) . . . . ? 
C13 C14 C15 C16 -0.8(3) . . . . ? 
C22 C14 C15 C16 -179.9(2) . . . . ? 
C14 C15 C16 C17 -0.7(4) . . . . ? 
C15 C16 C17 C18 1.6(4) . . . . ? 
C16 C17 C18 C13 -0.9(3) . . . . ? 
C16 C17 C18 C19 178.6(2) . . . . ? 
C14 C13 C18 C17 -0.6(3) . . . . ? 
N1 C13 C18 C17 179.00(19) . . . . ? 
C14 C13 C18 C19 179.9(2) . . . . ? 
N1 C13 C18 C19 -0.5(3) . . . . ? 
C17 C18 C19 C21 -60.7(3) . . . . ? 
C13 C18 C19 C21 118.8(2) . . . . ? 
C17 C18 C19 C20 62.2(3) . . . . ? 
C13 C18 C19 C20 -118.3(2) . . . . ? 
C15 C14 C22 C24 69.7(3) . . . . ? 
C13 C14 C22 C24 -109.4(2) . . . . ? 
C15 C14 C22 C23 -54.1(3) . . . . ? 
C13 C14 C22 C23 126.8(2) . . . . ? 
C29 N4 C27 C28 0.3(2) . . . . ? 
C34 N4 C27 C28 179.23(19) . . . . ? 
C29 N4 C27 Si1 -173.49(17) . . . . ? 
C34 N4 C27 Si1 5.5(3) . . . . ? 
N2 Si1 C27 C28 -73.4(2) . . . . ? 
N1 Si1 C27 C28 26.3(2) . . . . ? 
Si2 Si1 C27 C28 -22.7(2) . . . . ? 
N2 Si1 C27 N4 99.5(2) . . . . ? 
N1 Si1 C27 N4 -160.86(19) . . . . ? 
Si2 Si1 C27 N4 150.14(17) . . . . ? 
N4 C27 C28 N3 -1.1(2) . . . . ? 
Si1 C27 C28 N3 173.64(15) . . . . ? 
C29 N3 C28 C27 1.5(3) . . . . ? 
C30 N3 C28 C27 177.1(2) . . . . ? 
C27 N4 C29 N3 0.6(2) . . . . ? 
C34 N4 C29 N3 -178.37(18) . . . . ? 
C28 N3 C29 N4 -1.3(2) . . . . ? 
C30 N3 C29 N4 -176.92(19) . . . . ? 
C29 N3 C30 C32 90.9(3) . . . . ? 
C28 N3 C30 C32 -84.2(3) . . . . ? 
C29 N3 C30 C33 -29.3(3) . . . . ? 
C28 N3 C30 C33 155.7(2) . . . . ? 
C29 N3 C30 C31 -148.7(2) . . . . ? 
C28 N3 C30 C31 36.2(3) . . . . ? 
C29 N4 C34 C35 3.0(3) . . . . ? 
C27 N4 C34 C35 -175.88(19) . . . . ? 
C29 N4 C34 C37 -116.3(2) . . . . ? 
C27 N4 C34 C37 64.9(3) . . . . ? 
C29 N4 C34 C36 122.1(2) . . . . ? 
C27 N4 C34 C36 -56.7(3) . . . . ? 
Si3 N5 C38 C43 88.6(2) . . . . ? 
Si4 N5 C38 C43 -90.6(2) . . . . ? 
Si3 N5 C38 C39 -90.2(2) . . . . ? 
Si4 N5 C38 C39 90.6(2) . . . . ? 
C43 C38 C39 C40 0.3(3) . . . . ? 
N5 C38 C39 C40 179.09(18) . . . . ? 
C43 C38 C39 C47 -177.69(19) . . . . ? 
N5 C38 C39 C47 1.1(3) . . . . ? 
C38 C39 C40 C41 -0.8(3) . . . . ? 
C47 C39 C40 C41 177.3(2) . . . . ? 
C39 C40 C41 C42 0.7(3) . . . . ? 
C40 C41 C42 C43 -0.1(3) . . . . ? 
C41 C42 C43 C38 -0.4(3) . . . . ? 
C41 C42 C43 C44 -178.9(2) . . . . ? 
C39 C38 C43 C42 0.3(3) . . . . ? 
N5 C38 C43 C42 -178.53(18) . . . . ? 
C39 C38 C43 C44 178.67(19) . . . . ? 
N5 C38 C43 C44 -0.1(3) . . . . ? 
C42 C43 C44 C45 60.2(3) . . . . ? 
C38 C43 C44 C45 -118.2(2) . . . . ? 
C42 C43 C44 C46 -64.2(3) . . . . ? 
C38 C43 C44 C46 117.4(2) . . . . ? 
C40 C39 C47 C49 -62.0(3) . . . . ? 
C38 C39 C47 C49 116.0(2) . . . . ? 
C40 C39 C47 C48 62.0(3) . . . . ? 
C38 C39 C47 C48 -120.0(2) . . . . ? 
Si3 N6 C50 C55 119.4(2) . . . . ? 
Si4 N6 C50 C55 -89.9(2) . . . . ? 
Si3 N6 C50 C51 -60.5(3) . . . . ? 
Si4 N6 C50 C51 90.2(2) . . . . ? 
C55 C50 C51 C52 -3.3(3) . . . . ? 
N6 C50 C51 C52 176.65(19) . . . . ? 
C55 C50 C51 C59 176.22(19) . . . . ? 
N6 C50 C51 C59 -3.8(3) . . . . ? 
C50 C51 C52 C53 1.4(3) . . . . ? 
C59 C51 C52 C53 -178.1(2) . . . . ? 
C51 C52 C53 C54 0.8(4) . . . . ? 
C52 C53 C54 C55 -1.1(4) . . . . ? 
C53 C54 C55 C50 -0.9(4) . . . . ? 
C53 C54 C55 C56 179.0(2) . . . . ? 
C51 C50 C55 C54 3.0(3) . . . . ? 
N6 C50 C55 C54 -176.9(2) . . . . ? 
C51 C50 C55 C56 -176.9(2) . . . . ? 
N6 C50 C55 C56 3.2(3) . . . . ? 
C54 C55 C56 C58 61.2(3) . . . . ? 
C50 C55 C56 C58 -118.9(2) . . . . ? 
C54 C55 C56 C57 -62.2(3) . . . . ? 
C50 C55 C56 C57 117.7(2) . . . . ? 
C52 C51 C59 C60 -63.8(3) . . . . ? 
C50 C51 C59 C60 116.7(2) . . . . ? 
C52 C51 C59 C61 60.5(3) . . . . ? 
C50 C51 C59 C61 -119.0(2) . . . . ? 
C66 N8 C64 C65 0.0(2) . . . . ? 
C71 N8 C64 C65 -179.46(19) . . . . ? 
C66 N8 C64 Si3 172.90(18) . . . . ? 
C71 N8 C64 Si3 -6.6(3) . . . . ? 
N5 Si3 C64 C65 75.3(2) . . . . ? 
N6 Si3 C64 C65 -23.9(2) . . . . ? 
Si4 Si3 C64 C65 25.7(2) . . . . ? 
N5 Si3 C64 N8 -96.5(2) . . . . ? 
N6 Si3 C64 N8 164.24(19) . . . . ? 
Si4 Si3 C64 N8 -146.12(17) . . . . ? 
N8 C64 C65 N7 1.0(2) . . . . ? 
Si3 C64 C65 N7 -172.97(15) . . . . ? 
C66 N7 C65 C64 -1.7(3) . . . . ? 
C67 N7 C65 C64 -177.2(2) . . . . ? 
C64 N8 C66 N7 -1.0(2) . . . . ? 
C71 N8 C66 N7 178.51(19) . . . . ? 
C65 N7 C66 N8 1.6(2) . . . . ? 
C67 N7 C66 N8 177.22(19) . . . . ? 
C66 N7 C67 C69 -88.9(3) . . . . ? 
C65 N7 C67 C69 86.1(3) . . . . ? 
C66 N7 C67 C70 32.3(3) . . . . ? 
C65 N7 C67 C70 -152.7(2) . . . . ? 
C66 N7 C67 C68 151.2(2) . . . . ? 
C65 N7 C67 C68 -33.8(3) . . . . ? 
C66 N8 C71 C73 -7.9(3) . . . . ? 
C64 N8 C71 C73 171.47(19) . . . . ? 
C66 N8 C71 C74 -126.8(2) . . . . ? 
C64 N8 C71 C74 52.6(3) . . . . ? 
C66 N8 C71 C72 111.9(2) . . . . ? 
C64 N8 C71 C72 -68.6(2) . . . . ? 
  
_diffrn_measured_fraction_theta_max    0.995 
_diffrn_reflns_theta_full              25.02 
_diffrn_measured_fraction_theta_full   0.995 
_refine_diff_density_max    0.766 
_refine_diff_density_min   -0.604 
_refine_diff_density_rms    0.050 
